# Supplementary material
Source: PubMed Central journal article supplement (PMC8085161)
Supplement: NIHMS1673288-supplement-1.pdf [file NIHMS1673288-supplement-1.pdf]

**Supplementary Information for**  
**Single-molecule imaging reveals that Z ring condensation is**  
**essential for cell division in *Bacillus subtilis***

Georgia R. Squyres\*, Matthew J. Holmes\*, Sarah R. Barger, Betheney R. Pennycook,  
Joel Ryan, Victoria T. Yan, Ethan C. Garner†

\*Contributed equally

†Correspondence to: [egarner@g.harvard.edu](mailto:egarner@g.harvard.edu)

**Supplementary Table 1: Strains used in this study**

| Description                                                    | Strain | Genotype                                                                                                 | Source     |
|----------------------------------------------------------------|--------|----------------------------------------------------------------------------------------------------------|------------|
| <i>FtsZ single molecule imaging</i>                            |        |                                                                                                          |            |
| FtsZ                                                           | bAB309 | <i>amyE::erm-Phyperspank-ftsA-HaloTag-15aa-ftsZ</i>                                                      | this study |
| 2 colour                                                       | bGS104 | <i>amyE::erm-Phyperspank-ftsA-HaloTag-15aa-ftsZ, pbp2B::mNeonGreen-15aa-pbp2B</i>                        | this study |
| FtsZ(T111A)                                                    | bGS109 | <i>amyE::erm-Phyperspank-ftsA-HaloTag-15aa-ftsZ, ftsZ<math>\Omega</math>ftsZ(T111A) (tet)</i>            | this study |
| MciZ expression                                                | bGS328 | <i>amyE::erm-Phyperspank-ftsA-HaloTag-15aa-ftsZ, yvbJ::PxylA-mciZ::erm, pbp2B::mNeonGreen-15aa-pbp2B</i> | this study |
| $\Delta$ ezrA                                                  | bGS167 | <i>amyE::erm-Phyperspank-ftsA-HaloTag-15aa-ftsZ, ezrA::cat</i>                                           | this study |
| $\Delta$ sepF                                                  | bGS304 | <i>amyE::erm-Phyperspank-ftsA-HaloTag-15aa-ftsZ, sepF::scar</i>                                          | this study |
| $\Delta$ zapA                                                  | bGS141 | <i>amyE::erm-Phyperspank-ftsA-HaloTag-15aa-ftsZ, zapA-yshBD::tet</i>                                     | this study |
| $\uparrow$ ezrA                                                | bGS157 | <i>amyE::erm-Phyperspank-ftsA-HaloTag-15aa-ftsZ, ycgO::cat-pXyl-ezrA</i>                                 | this study |
| $\uparrow$ sepF                                                | bGS158 | <i>amyE::erm-Phyperspank-ftsA-HaloTag-15aa-ftsZ, ycgO::cat-pXyl-sepF</i>                                 | this study |
| $\uparrow$ zapA                                                | bGS159 | <i>amyE::erm-Phyperspank-ftsA-HaloTag-15aa-ftsZ, ycgO::cat-pXyl-zapA</i>                                 | this study |
| $\Delta$ sepF $\Delta$ zapA                                    | bGS318 | <i>amyE::erm-Phyperspank-ftsA-HaloTag-15aa-ftsZ, zapA-yshBD::tet, sepF::scar</i>                         | this study |
| $\Delta$ ezrA $\downarrow$ sepF                                | bGS204 | <i>amyE::erm-Phyperspank-ftsA-HaloTag-15aa-ftsZ, ezrA::scar, sepF::cat-pXyl-sepF</i>                     | this study |
| $\downarrow$ ezrA $\Delta$ sepF                                | bGS316 | <i>amyE::erm-Phyperspank-ftsA-HaloTag-15aa-ftsZ, sepF::scar, ezrA::cat-pXyl-ezrA</i>                     | this study |
| $\Delta$ ezrA $\downarrow$ zapA                                | bGS206 | <i>amyE::erm-Phyperspank-ftsA-HaloTag-15aa-ftsZ, ezrA::scar, zapA::cat-pXyl-zapA</i>                     | this study |
| $\downarrow$ ezrA $\Delta$ zapA                                | bGS306 | <i>amyE::erm-Phyperspank-ftsA-HaloTag-15aa-ftsZ, zapA-yshBD::tet, ezrA::cat-pXyl-ezrA</i>                | this study |
| $\downarrow$ ezrA $\Delta$ sepF $\Delta$ zapA ( $\Delta$ ZBPs) | bGS331 | <i>amyE::erm-Phyperspank-ftsA-HaloTag-15aa-ftsZ, zapA-yshBD::tet, sepF::scar, ezrA::cat-pXyl-ezrA</i>    | this study |
| <i>FtsZ filament and Z ring imaging</i>                        |        |                                                                                                          |            |
| FtsZ                                                           | bAB219 | <i>amyE::erm-Phyperspank-ftsA-mNeonGreen-15aa-ftsZ</i>                                                   | 5          |
| FtsZ                                                           | bGS630 | <i>ycgO::cat-pXyl-mNeonGreen-15aa-ftsZ</i>                                                               | this study |
| FtsZ(T111A)                                                    | bAB281 | <i>amyE::erm-Phyperspank-ftsA-mNeonGreen-15aa-ftsZ, ftsZ<math>\Omega</math>ftsZ(T111A) (tet)</i>         | 5          |
| MciZ expression                                                | bGS326 | <i>amyE::erm-Phyperspank-ftsA-mNeonGreen-15aa-ftsZ, yvbJ::PxylA-mciZ::erm</i>                            | this study |

|                                                                |        |                                                                                                            |            |
|----------------------------------------------------------------|--------|------------------------------------------------------------------------------------------------------------|------------|
| $\Delta$ ezrA                                                  | bGS256 | <i>amyE::erm-Phyperspank-ftsA-mNeonGreen-15aa-ftsZ, ezrA::cat</i>                                          | this study |
| $\Delta$ sepF                                                  | bGS254 | <i>amyE::erm-Phyperspank-ftsA-mNeonGreen-15aa-ftsZ, sepF::tet</i>                                          | this study |
| $\Delta$ zapA                                                  | bGS250 | <i>amyE::erm-Phyperspank-ftsA-mNeonGreen-15aa-ftsZ, zapA-yshBD::tet</i>                                    | this study |
| $\Delta$ ftsA                                                  | bGS639 | <i>ftsAZ::spec, amyE::pHyperspank-ftsZ, ycgO::cat-pXyl-mNeonGreen-15aa-ftsZ</i>                            | this study |
| $\downarrow$ ezrA                                              | bGS588 | <i>amyE::erm-Phyperspank-ftsA-mNeonGreen-15aa-ftsZ, ezrA::cat-pXyl-ezrA</i>                                | this study |
| $\downarrow$ sepF                                              | bGS590 | <i>amyE::erm-Phyperspank-ftsA-mNeonGreen-15aa-ftsZ, sepF::cat-pXyl-sepF</i>                                | this study |
| $\downarrow$ zapA                                              | bGS586 | <i>amyE::erm-Phyperspank-ftsA-mNeonGreen-15aa-ftsZ, zapA::cat-pXyl-zapA</i>                                | this study |
| $\uparrow$ ezrA                                                | bGS263 | <i>amyE::erm-Phyperspank-ftsA-mNeonGreen-15aa-ftsZ, ycgO::cat-pXyl-ezrA</i>                                | this study |
| $\uparrow$ sepF                                                | bGS260 | <i>amyE::erm-Phyperspank-ftsA-mNeonGreen-15aa-ftsZ, ycgO::cat-pXyl-sepF</i>                                | this study |
| $\uparrow$ zapA                                                | bGS259 | <i>amyE::erm-Phyperspank-ftsA-mNeonGreen-15aa-ftsZ, ycgO::cat-pXyl-zapA</i>                                | this study |
| $\Delta$ sepF $\Delta$ zapA                                    | bGS368 | <i>amyE::erm-Phyperspank-ftsA-mNeonGreen-15aa-ftsZ, sepF::scar, zapA-yshBD::tet</i>                        | this study |
| $\Delta$ ezrA $\downarrow$ sepF                                | bGS290 | <i>amyE::erm-Phyperspank-ftsA-mNeonGreen-15aa-ftsZ, ezrA::scar, sepF::cat-pXyl-sepF</i>                    | this study |
| $\downarrow$ ezrA $\Delta$ sepF                                | bGS298 | <i>amyE::erm-Phyperspank-ftsA-mNeonGreen-15aa-ftsZ, sepF::tet, ezrA::cat-pXyl-ezrA</i>                     | this study |
| $\Delta$ ezrA $\downarrow$ zapA                                | bGS293 | <i>amyE::erm-Phyperspank-ftsA-mNeonGreen-15aa-ftsZ, ezrA::scar, zapA::cat-pXyl-zapA</i>                    | this study |
| $\downarrow$ ezrA $\Delta$ zapA                                | bGS297 | <i>amyE::erm-Phyperspank-ftsA-mNeonGreen-15aa-ftsZ, zapA-yshBD::tet, ezrA::cat-pXyl-ezrA</i>               | this study |
| $\downarrow$ ezrA $\Delta$ sepF $\Delta$ zapA ( $\Delta$ ZBPs) | bGS308 | <i>amyE::erm-Phyperspank-ftsA-mNeonGreen-15aa-ftsZ, sepF::scar, zapA-yshBD::tet, ezrA::cat-pXyl-ezrA</i>   | this study |
| FtsZ(K86E)                                                     | bGS432 | <i>ftsZ::ftsZ(K86E), amyE::erm-Phyperspank-FtsA-mNeonGreen-15aa-FtsZ(K86E)</i>                             | this study |
| FtsZ(K86E) $\Delta$ ezrA $\Delta$ zapA                         | bGS463 | <i>ftsZ::ftsZ(K86E), amyE::erm-Phyperspank-FtsA-mNeonGreen-15aa-FtsZ(K86E), ezrA::cat, zapA-yshBD::tet</i> | this study |
| <i>Other divisome proteins: single molecule imaging</i>        |        |                                                                                                            |            |
| EzrA                                                           | bMH42  | <i>ftsZ::mNeonGreen-15aa-ftsZ multicopy ezrA::ezrA-30aa-HaloTag-cat</i>                                    | this study |
| SepF                                                           | bMH372 | <i>ftsZ::mNeonGreen-15aa-ftsZ multicopy amyE::erm-Phyperspank-sepF-30aa-HaloTag</i>                        | this study |
| ZapA                                                           | bMH560 | <i>ftsZ::mNeonGreen-15aa-ftsZ multicopy zapA::zapA-30aa-HaloTag-cat</i>                                    | this study |
| DivIB                                                          | bAB366 | <i>ftsZ::mNeonGreen-15aa-ftsZ multicopy divIB::erm-Pxyl-HaloTag-15aa-divIB</i>                             | this study |

|                                                                       |        |                                                                                                                                                                 |            |
|-----------------------------------------------------------------------|--------|-----------------------------------------------------------------------------------------------------------------------------------------------------------------|------------|
| DivIC                                                                 | bAB367 | <i>ftsZ::mNeonGreen-15aa-ftsZ multicopy</i><br><i>divIC::erm-Pxyl-HaloTag-15aa-divIC</i>                                                                        | this study |
| FtsL                                                                  | bGS165 | <i>ftsZ::mNeonGreen-15aa-ftsZ multicopy</i><br><i>ftsL::erm-Phyperspank-HaloTag-15aa-ftsL</i>                                                                   | this study |
| FtsW                                                                  | bAB368 | <i>ftsZ::mNeonGreen-15aa-ftsZ multicopy</i><br><i>ftsW::erm-Pxyl-HaloTag-15aa-ftsW</i>                                                                          | this study |
| Pbp2B                                                                 | bGS31  | <i>ftsZ::erm-mNeonGreen-15aa-ftsZ-cat multicopy</i><br><i>pbp2b::erm-pHyperSpank-HaloTag-15aa-pbp2b</i>                                                         | 5          |
| <i>Other divisome proteins: single molecule lifetime measurements</i> |        |                                                                                                                                                                 |            |
| FtsA                                                                  | bAB213 | <i>ftsAZ::erm-ftsA-HaloTag(sw)-ftsZ-cat multicopy</i>                                                                                                           | 5          |
| EzrA                                                                  | bMH03  | <i>ezrA::ezrA-30aa-HaloTag-cat</i>                                                                                                                              | this study |
| SepF                                                                  | bMH332 | <i>amyE::erm-Phyperspank-sepF-30aa-HaloTag</i>                                                                                                                  | this study |
| ZapA                                                                  | bMH559 | <i>zapA::zapA-30aa-HaloTag-cat</i>                                                                                                                              | this study |
| <i>Pbp2B dynamics</i>                                                 |        |                                                                                                                                                                 |            |
| Control                                                               | bMH512 | <i>pbp2B::erm-Phyperspank-HaloTag-15aa-pbp2B,</i><br><i>amyE::kan-Paz-ftsA-mNeonGreen-15aa-ftsZ</i>                                                             | this study |
| ↓ <i>ezrA</i> Δ <i>sepF</i> Δ <i>zapA</i><br>(ΔZBPs)                  | bMH443 | <i>pbp2B::erm-Phyperspank-HaloTag-15aa-pbp2B,</i><br><i>amyE::kan-Paz-ftsA-mNeonGreen-15aa-ftsZ,</i><br><i>sepF::scar, zapA-yshBD::tet, ezrA::cat-pXyl-ezrA</i> | this study |
| <i>Pbp2B colocalization</i>                                           |        |                                                                                                                                                                 |            |
| Control                                                               | bGS104 | see above                                                                                                                                                       | this study |
| Δ <i>ezrA</i> ↓ <i>zapA</i>                                           | bGS644 | <i>pbp2B::mNeonGreen-15aa-pbp2B,</i><br><i>amyE::Phyperspank-ftsA-HaloTag-15aa-ftsZ,</i><br><i>zapA::pXyl-zapA, ezrA::cat</i>                                   | this study |
| ↓ <i>ezrA</i> Δ <i>sepF</i> Δ <i>zapA</i><br>(ΔZBPs)                  | bMH445 | <i>pbp2B::mNeonGreen-15aa-pbp2B, amyE::erm-</i><br><i>Phyperspank-ftsA-HaloTag-15aa-ftsZ, sepF::scar,</i><br><i>zapA-yshBD::tet, ezrA::cat-pXyl-ezrA</i>        | this study |
| FtsZ(K86E)                                                            | bGS618 | <i>ftsZ::ftsZ(K86E), pbp2B::mNeonGreen-15aa-pbp2B,</i><br><i>amyE::erm-Phyperspank-ftsA-HaloTag-15aa-</i><br><i>ftsZ(K86E)</i>                                  | this study |
| FtsZ(K86E)<br>Δ <i>ezrA</i> Δ <i>zapA</i>                             | bGS628 | <i>ftsZ::ftsZ(K86E), pbp2B::mNeonGreen-15aa-pbp2B,</i><br><i>amyE::erm-Phyperspank-ftsA-HaloTag-15aa-</i><br><i>ftsZ(K86E), zapA-yshBD::tet, ezrA::cat</i>      | this study |
| <i>Cell wall synthesis labelling</i>                                  |        |                                                                                                                                                                 |            |
| Control                                                               | bMH510 | <i>amyE::erm-Phyperspank-ftsA-HaloTag-15aa-ftsZ,</i><br><i>dacA::kan</i>                                                                                        | this study |
| ↓ <i>ezrA</i> Δ <i>sepF</i> Δ <i>zapA</i><br>(ΔZBPs)                  | bMH508 | <i>amyE::erm-Phyperspank-ftsA-HaloTag-15aa-ftsZ,</i><br><i>sepF::scar, zapA-yshB::tet, ezrA::cat-pXyl-ezrA,</i><br><i>dacA::kan</i>                             | this study |
| <i>Cell length measurements</i>                                       |        |                                                                                                                                                                 |            |
| WT                                                                    | PY79   | wild type                                                                                                                                                       | 63         |
| HT-FtsZ                                                               | bAB309 | see above                                                                                                                                                       | this study |
| FtsA-HT(sw)                                                           | bAB213 | see above                                                                                                                                                       | 5          |
| EzrA-HT                                                               | bMH03  | see above                                                                                                                                                       | this study |

|                              |        |                                                           |            |
|------------------------------|--------|-----------------------------------------------------------|------------|
| SepF-HT                      | bMH332 | <i>see above</i>                                          | this study |
| ZapA-HT                      | bMH559 | <i>see above</i>                                          | this study |
| HT-DivIB                     | bAB352 | <i>divIB::erm-Pxyl-HaloTag-15aa-divIB</i>                 | this study |
| HT-DivIC                     | bAB347 | <i>divIC::erm-Pxyl-HaloTag-15aa-divIC</i>                 | this study |
| HT-FtsL                      | bMH47  | <i>ftsL::erm-Phyperspank-HaloTag-15aa-ftsL</i>            | this study |
| HT-FtsW                      | bAB350 | <i>ftsW::erm-Pxyl-HaloTag-15aa-ftsW</i>                   | this study |
| HT-Pbp2B                     | bGS28  | <i>pbp2b::erm-pHyperSpank-HaloTag-15aa-pbp2b</i>          | 5          |
| $\Delta$ <i>ezaA</i>         | bMH45  | <i>ezaA::cat</i>                                          | this study |
| $\Delta$ <i>sepF</i>         | bSW234 | <i>sepF::tet</i>                                          | this study |
| $\Delta$ <i>zapA</i>         | RL2638 | <i>zapA-yshBD::tet</i>                                    | 18         |
| $\Delta$ <i>divIB</i>        | bMH92  | <i>divIB::cat</i>                                         | this study |
| $\Delta$ <i>zapA</i> EzrA-HT | bMH221 | <i>zapA-yshBD::tet, ezaA::ezaA-30aa-HaloTag-cat</i>       | this study |
| $\Delta$ <i>ezaA</i> SepF-HT | bMH542 | <i>ezaA::cat, amyE::erm-Phyperspank-sepF-30aa-HaloTag</i> | this study |
| $\Delta$ <i>ezaA</i> ZapA-HT | bMH565 | <i>ezaA::scar, zapA::zapA-30aa-HaloTag-cat</i>            | this study |

Abbreviations:  $\uparrow$ : overexpression,  $\downarrow$ : depletion, 15aa: 15 amino acid linker, 30aa: 30 amino acid linker, (sw): sandwich fusion, scar: genomic scar remaining after an antibiotic cassette has been looped out, Paz: promoter of *ftsA-ftsZ* operon, multicopy: genotype of bAB185<sup>5</sup>.

## Supplementary Table 2: Constructs used in this study

### Constructs from other studies

| Construct                                              | Reference              |
|--------------------------------------------------------|------------------------|
| <i>amyE::erm-Phyperspank-ftsA-mNeonGreen-15aa-ftsZ</i> | 5                      |
| <i>amyE::erm-pHyperspank-ftsZ</i>                      | 5                      |
| <i>ftsZ::mNeonGreen-15aa-ftsZ multicopy</i>            | 5                      |
| <i>ftsAZ::erm-ftsA-HaloTag(sw)-ftsZ-cat multicopy</i>  | 5                      |
| <i>pbp2B::mNeonGreen-15aa-pbp2B</i>                    | 5                      |
| <i>pbp2b::erm-pHyperSpank-HaloTag-15aa-pbp2b</i>       | 5                      |
| <i>ftsZ<math>\Delta</math>ftsZ(T111A) (tet)</i>        | 5                      |
| <i>yvbJ::PxylA-mciZ::erm</i>                           | Gift from D. Z. Rudner |
| <i>zapA-yshBD::tet</i>                                 | 18                     |
| <i>dacA::kan</i>                                       | 64                     |

### Constructs created in this study

| Amplicon                                                                     | Primer: Sequence (5' to 3')                                                                          |
|------------------------------------------------------------------------------|------------------------------------------------------------------------------------------------------|
| <i>amyE::erm-Phyperspank-ftsA-HaloTag-15aa-ftsZ</i>                          |                                                                                                      |
| amyE(up)-erm-Phyperspank-ftsA                                                | oMD191: TTTGGATGGATTCAGCCCGATTG<br>oAB13: ccagtaccgatttctgccatGCTAAATCCTCCTAATCTGCCGAATG             |
| HaloTag-15aa                                                                 | oJE32: ATGGCAGAAATCGGTACTGG<br>oAB14: tggcctgagcccggctccctggccagatccctcgagGCCGCTGATTTCTAAGGTAGAAAG   |
| 15aa-ftsZ-amyE(down)                                                         | oAB140: ggaccgggctcaggccaaggaagcggcATGTTGGAGTTCGAAACAAACATAGACG<br>oMD197: TCACATACTCGTTTCCAAACGGATC |
| <i>amyE::kan-Paz-ftsA-mNeonGreen-15aa-ftsZ</i>                               |                                                                                                      |
| amyE(up)-kan                                                                 | oMD191: TTTGGATGGATTCAGCCCGATTG<br>oSW42: TTCTGCTCCCTCGC                                             |
| pAZ-ftsA(partial)                                                            | oAB76: gaacgggtactgagcgagggagcagaaGTATTTGTTTCCGGTTTCT<br>oAB38: GCGAAGCTCTTCTGA                      |
| this assembly was transformed directly into bAB219 to complete the construct |                                                                                                      |
| <i>ycgO::cat-pXyl-mNeonGreen-15aa-ftsZ</i>                                   |                                                                                                      |
| ycgO(up)-cat-pXyl                                                            | oMD247: ATCGAACTGGCAAAGGCAAAC<br>oMD226: GGTAGTTCCTCCTTAATCGATCCATTCAAATACAGATGCATTTTATTTTC          |

|                                                                                                       |                                                                                                                                            |
|-------------------------------------------------------------------------------------------------------|--------------------------------------------------------------------------------------------------------------------------------------------|
| mNeonGreen-15aa-ftsZ                                                                                  | oGS35: tcgattaaggaggaactaccATGGTTTCGAAAGGAGAGGAGGATAATATG<br>oGS40: gggacagcccctcctcctccttctgatctTTAGCCGCGTTTATTACGGTTTC                   |
| ycgO(down)                                                                                            | oMD257: AGATCGAAAGGAGGAGGAAGG<br>oMD252: CAAGGTTTTGAGCAGCTCAGTG                                                                            |
| <i>ftsAZ::spec</i>                                                                                    |                                                                                                                                            |
| ftsA(up)                                                                                              | oAB23: GCGGGTGAAATAGATTGAAAATAAAGC<br>oAB72: atgctatacgaacggtagtgaccagtgtccctgTCTATGGCACCTCCTCACAT                                         |
| spec                                                                                                  | oSW40: CAGGGAGCACTGGTC<br>oSW42: TTCTGCTCCCTCGC                                                                                            |
| ftsZ(down)                                                                                            | oAB73: acattatacgaacggtagtgagcgagggagcagaaTGTAAGGACAAAATCGTTT<br>oAB30: CCATCCTCATATGTCTGACC                                               |
| this assembly was transformed into a strain containing a second copy of ftsAZ under inducible control |                                                                                                                                            |
| <i>ftsZ::ftsZ(K86E)-kan</i>                                                                           |                                                                                                                                            |
| ftsZ(up)-ftsZ(K86E)                                                                                   | oWM20: ATGAACAACAATGAACTTTACGTC<br>oWM66: cagggagcactggtaactaccgttctgatTTAGCCGCGTTTATTACGGT                                                |
| kan                                                                                                   | oSW40: CAGGGAGCACTGGTC<br>oSW42: TTCTGCTCCCTCGC                                                                                            |
| ftsZ(down)                                                                                            | oAB73: acattatacgaacggtagtgagcgagggagcagaaTGTAAGGACAAAATCGTTT<br>oAB30: CCATCCTCATATGTCTGACC                                               |
| <i>amyE::erm-Phyperspank-FtsA-mNeonGreen-15aa-FtsZ(K86E)</i>                                          |                                                                                                                                            |
| amyE(up)-erm-Phyperspank                                                                              | oMD191: TTTGGATGGATTTCAGCCCGATTG<br>oMD232: GGTAGTTCCTCCTTAAAGCTTAATTGTTATCCGCTCACAAT                                                      |
| ftsA-mNeonGreen-15aa                                                                                  | oAB78: agcggataacaattaagctttaaggaggaactaccATGAACAACAATGAACTTTACGTC<br>oZB34: tggcctgagcccggctccctggccagatccctcgagCTTATAGAGTTCATCCATACCCATC |
| 15aa-FtsZ(K86E)                                                                                       | oAB140: ggaccgggctcaggccaaggaagcggcATGTTGGAGTTCGAAACAAACATAGACG<br>oAB94: ctttcgtaagtcccgtctagccttgcccTTAGCCGCGTTTATTACGGTTTC              |
| amyE(down)                                                                                            | oMD196: GGGCAAGGCTAGACGGG<br>oMD197: TCACATACTCGTTTCCAAACGGATC                                                                             |
| <i>amyE::erm-Phyperspank-FtsA-HaloTag-15aa-FtsZ(K86E)</i>                                             |                                                                                                                                            |
| amyE(up)-erm-Phyperspank                                                                              | oMD191: TTTGGATGGATTTCAGCCCGATTG<br>oMD232: GGTAGTTCCTCCTTAAAGCTTAATTGTTATCCGCTCACAAT                                                      |
| ftsA-HaloTag-15aa                                                                                     | oAB78: agcggataacaattaagctttaaggaggaactaccATGAACAACAATGAACTTTACGTC<br>oAB14: tggcctgagcccggctccctggccagatccctcgagGCCGCTGATTTCTAAGGTAGAAAG  |
| 15aa-FtsZ(K86E)                                                                                       | oAB140: ggaccgggctcaggccaaggaagcggcATGTTGGAGTTCGAAACAAACATAGACG<br>oAB94: ctttcgtaagtcccgtctagccttgcccTTAGCCGCGTTTATTACGGTTTC              |

|                            |                                                                                                                                  |
|----------------------------|----------------------------------------------------------------------------------------------------------------------------------|
| amyE(down)                 | oMD196: GGGCAAGGCTAGACGGG<br>oMD197: TCACATACTCGTTTCCAAACGGATC                                                                   |
| <i>sepF::tet</i>           |                                                                                                                                  |
| sepF(up)                   | oMH43: TATTGGCCCGTCTATCAG<br>oMH98: gcgaggagcagaaCTCATTGCTGTACACCCC                                                              |
| tet                        | oSW40: CAGGGAGCACTGGTC<br>oSW42: TTCTGCTCCCTCGC                                                                                  |
| sepF(down)                 | oMH20: tgaccagtgtccctgAGCGAGATGATCCTTTATCAAG<br>oMH21: CTATGTATGAAGGATCTTCAACCA                                                  |
| <i>ezaA::cat</i>           |                                                                                                                                  |
| ezaA(up)                   | oMH53: GACATCTCCCGCTTGATG<br>oAB99: cgaacggtactgagcagggagcagaaAATGAGCCCCCTTGCTGT                                                 |
| cat                        | oJM28: TTCTGCTCCCTCGCTCAG<br>oJM29: CAGGGAGCACTGGTCAAC                                                                           |
| ezaA(down)                 | oMH05: tgaccagtgtccctgATAATCACGACCATGAAAAAGAG<br>oMH06: GTTGTGGATCGAGTCGGA                                                       |
| <i>ycgO::cat-pXyl-ezaA</i> |                                                                                                                                  |
| ycgO(up)                   | oMD247: ATCGAACTGGCAAAGGCAAAC<br>oMD248: tacgaacggtagttgaccagtgtccctgTCCCGCCATATAAATACAAATCGAAATAATC                             |
| cat-pXyl                   | oSW40: CAGGGAGCACTGGTC<br>oMD226: GGTAGTTCCTCCTTAATCGATCCATTCAAATACAGATGCATTTTATTTTC                                             |
| ezaA                       | oMH14: atcgattaaggaggaactaccATGGAGTTTGTTCATTGGATTATTA<br>oGS37: acagccccttctctctcttctgatctCTAAGCGGATATGTCAGCTT                   |
| ycgO(down)                 | oMD257: AGATCGAAAGGAGGAGGAAGG<br>oMD252: CAAGGTTTTGAGCAGCTCAGTG                                                                  |
| <i>ycgO::cat-pXyl-sepF</i> |                                                                                                                                  |
| ycgO(up)                   | oMD247: ATCGAACTGGCAAAGGCAAAC<br>oMD248: tacgaacggtagttgaccagtgtccctgTCCCGCCATATAAATACAAATCGAAATAATC                             |
| cat-pXyl                   | oSW40: CAGGGAGCACTGGTC<br>oMD226: GGTAGTTCCTCCTTAATCGATCCATTCAAATACAGATGCATTTTATTTTC                                             |
| sepF                       | oGS38: atggatcgattaaggaggaactaccATGAAAAATAAACTGAAAACTTTTTCTCAATGG<br>oGS39: gggacagccccttctctctcttctgatctTTAGCCGCGTTTATTACGGTTTC |
| ycgO(down)                 | oMD257: AGATCGAAAGGAGGAGGAAGG<br>oMD252: CAAGGTTTTGAGCAGCTCAGTG                                                                  |
| <i>ycgO::cat-pXyl-zapA</i> |                                                                                                                                  |
| ycgO(up)                   | oMD247: ATCGAACTGGCAAAGGCAAAC<br>oMD248: tacgaacggtagttgaccagtgtccctgTCCCGCCATATAAATACAAATCGAAATAATC                             |



|                                                |                                                                                                                         |
|------------------------------------------------|-------------------------------------------------------------------------------------------------------------------------|
| cat                                            | oSW40: CAGGGAGCACTGGTC<br>oSW42: TTCTGCTCCCTCGC                                                                         |
| pXyl-zapA                                      | oSW38: cattatacgaacggtactgagcggaggagcagaaGAATTCGAGCTTGCATG<br>oGS36: acagccccttctcctcttctgatctTCAATCCTTTTCTTTAAGCTGACGC |
| ycgO(down)                                     | oMD257: AGATCGAAAGGAGGAGGAAGG<br>oMD252: CAAGGTTTTGAGCAGCTCAGTG                                                         |
| <i>ezrA::cat-pXyl-ezrA</i>                     |                                                                                                                         |
| ezrA(up)                                       | oMH35: GAATATGTCCGTCTCGCT<br>oMH54: tgaccagtgtccctgAATGAGCCCCCTTGCTG                                                    |
| cat-pXyl                                       | oSW40: CAGGGAGCACTGGTC<br>oMD226: GGTAGTTCCTCCTTAATCGATCCATTCAAATACAGATGCATTTTATTTTC                                    |
| ezrA(partial)                                  | oMH14: atcgattaaggaggaactaccATGGAGTTTGTTCATTGGATTATTA<br>oMH56: CTTAGTACGGATTGACCGG                                     |
| <i>sepF::cat-pXyl-sepF</i>                     |                                                                                                                         |
| sepF(up)                                       | oAB109: GCCCGTGAGTATCACACG<br>oAB110: gctatacgaacggtagttgaccagtgtccctgACTCATTGCTGTACACCCCC                              |
| cat-pXyl                                       | oSW40: CAGGGAGCACTGGTC<br>oMD226: GGTAGTTCCTCCTTAATCGATCCATTCAAATACAGATGCATTTTATTTTC                                    |
| sepF-sepF(down)                                | oGS38: atggatcgattaaggaggaactaccATGAAAAATAAACTGAAAAACTTTTTCTCAATGG<br>oAB112: GCCAAAACCTCTGATAGACAGC                    |
| <i>zapA::cat-pXyl-zapA</i>                     |                                                                                                                         |
| zapA(up)                                       | oMH22: AATGGCTTCAGGCTTTACTC<br>oMH58: tgaccagtgtccctgCGTTTCTCCTCCATTCCG                                                 |
| cat-pXyl                                       | oSW40: CAGGGAGCACTGGTC<br>oMD226: GGTAGTTCCTCCTTAATCGATCCATTCAAATACAGATGCATTTTATTTTC                                    |
| zapA-zapA(down)                                | oAB152: gtatttgaatggatcgattaaggaggaactaccTTGTCTGACGGCAAAAAACA<br>oMH31: AGAGATTCTGCATCGTGT                              |
| <i>ezrA::ezrA-30aa-HaloTag-cat</i>             |                                                                                                                         |
| ezrA(partial)                                  | oMH01: GATTGCAAAGCTCAAGGATG<br>oMH02: AGCGGATATGTCAGCTTTGA                                                              |
| 30aa-HaloTag                                   | oMH03: caaagctgacatatccgctCTTGAGGGTAGCGGACAAG<br>oMH04: agcgaggagcagaaTTAGCCGCTGATTTCTAAGGTAG                           |
| cat                                            | oJM28: TTCTGCTCCCTCGCTCAG<br>oJM29: CAGGGAGCACTGGTCAAC                                                                  |
| ezrA(down)                                     | oMH05: tgaccagtgtccctgATAATCACGACCATGAAAAAGAG<br>oMH06: GTTGTGGATCGAGTCGGA                                              |
| <i>amyE::erm-Phyverspank-sepF-30aa-HaloTag</i> |                                                                                                                         |

|                                                |                                                                                                                   |
|------------------------------------------------|-------------------------------------------------------------------------------------------------------------------|
| amyE(up)-erm-pHyperSpank                       | oMD191: TTTGGATGGATTTCAGCCCGATTG<br>oSW28: GGTAGTTCCTCCTTAAAGC                                                    |
| SepF-15aa-HaloTag                              | oMH45: ttaagcttaaggaggaactaccATGAGTATGAAAATAAACTGAAAACTT<br>oAB257: cggtaagtcccgtctagccttgcccTTAGCCGCTGATTTCTAAGG |
| amyE(down)                                     | oMD196: GGGCAAGGCTAGACGGG<br>oMD197: TCACATACTCGTTTCCAAACGGATC                                                    |
| <i>zapA::zapA-30aa-HaloTag-cat</i>             |                                                                                                                   |
| zapA(up)                                       | oMH22: AATGGCTTCAGGCTTTACTC<br>oMH24: gtccgctaccctcaagATCCTTTTCTTTAAGCTGACGC                                      |
| 30aa-HaloTag-cat                               | oMH25: CTTGAGGGTAGCGGACAA<br>oSW40: CAGGGAGCACTGGTC                                                               |
| zapA-zapA(down)                                | oMH29: tgaccagtgtccctgacaactATGCTAGATATCATCATC<br>oMH31: AGAGATTCTGCATCGTGT                                       |
| <i>divIB::cat</i>                              |                                                                                                                   |
| divIB(up)                                      | oAB235: GCCTGAGTATTTAAAGGCCATTG<br>oAB236: gtagtgaccagtgtccctgTGCCTGTTCACCTCATTCAA                                |
| cat                                            | oJM28: TTCTGCTCCCTCGCTCAG<br>oJM29: CAGGGAGCACTGGTCAAC                                                            |
| divIB(down)                                    | oMH100: tgagcgaggagcagAATTGAGGGGCAAATCAGC<br>oAB238: CGCAAGCGATAAATAGTTTGAG                                       |
| <i>divIB::erm-Pxyl-HaloTag-15aa-divIB</i>      |                                                                                                                   |
| divIB(up)                                      | oAB235: GCCTGAGTATTTAAAGGCCATTG<br>oAB236: gtagtgaccagtgtccctgTGCCTGTTCACCTCATTCAA                                |
| erm-Pxyl-HaloTag-15aa                          | oJM29: CAGGGAGCACTGGTCAAC<br>oAB14: tggcctgagcccgggtccctggccagatccctcgagGCCGCTGATTTCTAAGGTAGAAAG                  |
| 15aa-divIB-divIB(down)                         | oAB237: ctggccagggaccgggctcaggccaaggaagcggcATGAACCCGGGTCAAGAC<br>oAB238: CGCAAGCGATAAATAGTTTGAG                   |
| <i>divIC::erm-Pxyl-HaloTag-15aa-divIC</i>      |                                                                                                                   |
| divIC(up)                                      | oAB239: CGGCGTACACTAGCGAA<br>oAB240: gtagtgaccagtgtccctgACCAGACGGTCCTCCTTTC                                       |
| erm-Pxyl-HaloTag-15aa                          | oJM29: CAGGGAGCACTGGTCAAC<br>oAB14: tggcctgagcccgggtccctggccagatccctcgagGCCGCTGATTTCTAAGGTAGAAAG                  |
| 15aa-divIC-divIC(down)                         | oAB241: ctggccagggaccgggctcaggccaaggaagcggcTTGAATTTTTCCAGGGAACG<br>oAB242: CAGTGAATGCAAATGATGAGTC                 |
| <i>ftsL::erm-Phyverspank-HaloTag-15aa-ftsL</i> |                                                                                                                   |

|                                         |                                                                                                                                                                                                                                                                          |
|-----------------------------------------|--------------------------------------------------------------------------------------------------------------------------------------------------------------------------------------------------------------------------------------------------------------------------|
| ftsL(up)                                | oMH49: CTTCTTCGTGAAACCGTAGA<br>oMH50: tgaccagtctccctgaGGCTGATGACCTCCTTTTA                                                                                                                                                                                                |
| erm-Phyerspank-HaloTag-15aa             | oSW40: CAGGGAGCACTGGTC<br>oAB14: tggcctgagcccgggtccctggccagatccctcgagGCCGCTGATTTCTAAGGTAGAAAG                                                                                                                                                                            |
| 15aa-ftsL                               | oMH61: agggaccgggctcaggccaaggaagcggcATGAGCAATTTAGCTTACCAACC<br>oMH52: CGCTCCTTCAAATACTTATCCA                                                                                                                                                                             |
| <i>ftsW::erm-Pxyl-HaloTag-15aa-ftsW</i> |                                                                                                                                                                                                                                                                          |
| ftsW(up)                                | oME1: GAGAGACTTGATTATTTGCTTTCTTTTATC<br>oAB234: gtagtgaccagtgtccctgAACATCCTCTTCCCTGCTTC                                                                                                                                                                                  |
| erm-Pxyl-HaloTag-15aa                   | oJM29: CAGGGAGCACTGGTCAAC<br>oAB14: tggcctgagcccgggtccctggccagatccctcgagGCCGCTGATTTCTAAGGTAGAAAG                                                                                                                                                                         |
| 15aa-ftsW                               | oME6: ctcgagggatctggccagggaccgggctcaggccaaggaagcggcATGTTAAAAAAATGCTAA<br>AATCTTATGATTACTCAC<br>oME7: GTACACACTTGTTTTTTACAGATAAACAG<br>oME6: ctcgagggatctggccagggaccgggctcaggccaaggaagcggcATGTTAAAAAAATGCTAA<br>AATCTTATGATTACTCAC<br>oME7: GTACACACTTGTTTTTTACAGATAAACAG |

Abbreviations: 15aa: 15 amino acid linker, 30aa: 30 amino acid linker, (sw): sandwich fusion, (up): homology region upstream of the indicated gene, (down): homology region downstream of the indicated gene, multicopy: genotype of bAB185<sup>5</sup>. For primers, uppercase sequence indicates annealing region, and lowercase sequence indicates overhang.

**Supplementary Table 3: FtsZ treadmilling velocity and velocities of other divisome proteins**

| Condition                                           | Strain              | Velocity (nm/s) | N   |
|-----------------------------------------------------|---------------------|-----------------|-----|
| <b><i>FtsZ treadmilling velocities</i></b>          |                     |                 |     |
| Control                                             | bAB219              | 28.5 ± 9.8      | 119 |
| ΔezrA                                               | bGS256              | 26.2 ± 8.1      | 132 |
| ΔsepF                                               | bGS254              | 26.3 ± 7.5      | 120 |
| ΔzapA                                               | bGS250              | 28.2 ± 6.9      | 125 |
| ↑ezrA 100 μM xyl                                    | bGS263 + 100 μM xyl | 28.4 ± 8.5      | 134 |
| ↑ezrA 500 μM xyl                                    | bGS263 + 500 μM xyl | 28.9 ± 9.9      | 128 |
| ↑ezrA 5 mM xyl                                      | bGS263 + 5 mM xyl   | 28.7 ± 9.3      | 128 |
| ↑sepF                                               | bGS260 + 30 mM xyl  | 27.7 ± 7.3      | 118 |
| ↑zapA                                               | bGS259 + 30 mM xyl  | 24.1 ± 6.6      | 110 |
| ΔsepF ΔzapA                                         | bGS368              | 26.3 ± 7.3      | 132 |
| ΔezrA ↓sepF                                         | bGS290              | 28.2 ± 8.6      | 143 |
| ↓ezrA ΔsepF                                         | bGS298              | 27.4 ± 7.6      | 121 |
| ΔezrA ↓zapA                                         | bGS293              | 28.2 ± 7.3      | 137 |
| ↓ezrA ΔzapA                                         | bGS297              | 27.2 ± 8.0      | 126 |
| ↓ezrA ΔsepF ΔzapA (ΔZBPs)                           | bGS308              | 27.6 ± 7.1      | 136 |
| FtsZ(K86E)                                          | bGS432              | 29.2 ± 9.2      | 123 |
| FtsZ(K86E) ΔezrA ΔzapA                              | bGS463              | 27.8 ± 6.9      | 140 |
| <b><i>Velocities of other divisome proteins</i></b> |                     |                 |     |
| DivIB                                               | bAB366              | 26.2 ± 4.8      | 270 |
| DivIC                                               | bAB367              | 26.7 ± 5.1      | 285 |
| FtsL                                                | bGS165              | 25.4 ± 4.7      | 261 |
| FtsW                                                | bAB368              | 24.1 ± 7.5      | 120 |
| Pbp2B                                               | bGS31               | 25.6 ± 6.8      | 98  |

Velocity: mean ± standard deviation. N: number of trajectories analysed. Abbreviations: ↑: overexpression, ↓: depletion, xyl: xylose.

**Supplementary Table 4: Single-molecule lifetimes**

| Condition                                         | Strain               | Lifetime (s)      | N    | p-value            |
|---------------------------------------------------|----------------------|-------------------|------|--------------------|
| <i>FtsZ lifetimes</i>                             |                      |                   |      |                    |
| Control                                           | bAB309, bGS104       | 8.1 (7.6, 8.7)    | 1897 |                    |
| ↑ <i>ftsAZ</i>                                    | bAB309 + 100 μM IPTG | 8.8 (6.7, 13)     | 455  | ns<br>(0.19)       |
| FtsZ(T111A)                                       | bGS109               | 16.5 (12.6, 23.8) | 337  | ****<br>(3.04e-18) |
| MciZ expression                                   | bGS328 + 60 mM xyl   | 3.9 (3.1, 5.1)    | 442  | ****<br>(3.35e-25) |
| Δ <i>ezrA</i>                                     | bGS167               | 11.3 (7.8, 20.2)  | 820  | ****<br>(2.44e-10) |
| Δ <i>sepF</i>                                     | bGS304               | 7.4 (6.5, 8.5)    | 446  | ns<br>(0.18)       |
| Δ <i>zapA</i>                                     | bGS141               | 7.3 (6.4, 8.5)    | 348  | ns<br>(0.24)       |
| ↑ <i>ezrA</i> 100 μM xyl                          | bGS157 + 100 μM xyl  | 6.1 (5.5, 6.8)    | 461  | ***<br>(7.4e-04)   |
| ↑ <i>ezrA</i> 500 μM xyl                          | bGS157 + 500 μM xyl  | 4.6 (4.2, 5)      | 163  | ****<br>(1.54e-06) |
| ↑ <i>ezrA</i> 5 mM xyl                            | bGS157 + 5 mM xyl    | 4 (3.6, 4.4)      | 285  | ****<br>(2.34e-19) |
| ↑ <i>sepF</i>                                     | bGS158 + 30 mM xyl   | 6.1 (5.7, 6.7)    | 338  | ****<br>(1e-6)     |
| ↑ <i>zapA</i>                                     | bGS159 + 30 mM xyl   | 8.7 (7, 11.4)     | 531  | *<br>(0.01)        |
| Δ <i>sepF</i> Δ <i>zapA</i>                       | bGS318               | 7.8 (6.9, 8.9)    | 324  | ns<br>(0.3)        |
| Δ <i>ezrA</i> ↓ <i>sepF</i>                       | bGS204               | 7.8 (6.7, 9.3)    | 146  | ns<br>(0.68)       |
| ↓ <i>ezrA</i> Δ <i>sepF</i>                       | bGS316               | 8.1 (6.8, 10.2)   | 399  | ns<br>(0.41)       |
| Δ <i>ezrA</i> ↓ <i>zapA</i>                       | bGS206               | 8.4 (5.8, 15.3)   | 654  | ns<br>(0.9)        |
| ↓ <i>ezrA</i> Δ <i>zapA</i>                       | bGS306               | 9.4 (7.4, 13)     | 281  | ns<br>(0.63)       |
| ↓ <i>ezrA</i> Δ <i>sepF</i> Δ <i>zapA</i> (ΔZBPs) | bGS331               | 7.4 (5.7, 10.3)   | 193  | ns<br>(0.26)       |
| 2 colour: outside of Z ring                       | bGS104               | 5.6 (5.2, 6.1)    | 383  |                    |

|                                       |        |                |      |                    |
|---------------------------------------|--------|----------------|------|--------------------|
| 2 colour: inside of Z ring            | bGS104 | 11 (8, 17.4)   | 238  |                    |
| 1 second intervals                    | bAB309 | 8.2 (7.3, 9.4) | 418  | ns<br>(0.53)       |
| <b><i>Lifetimes of other ZBPs</i></b> |        |                |      |                    |
| FtsA                                  | bAB213 | 4.5 (3.9, 5.5) | 222  | ****<br>(2.74e-08) |
| EzrA                                  | bMH03  | 4.7 (4.1, 5.4) | 1160 | ****<br>(1.88e-22) |
| SepF                                  | bMH332 | 8 (6, 12)      | 642  | ***<br>(2.27e-4)   |
| ZapA                                  | bMH559 | 6.7 (5.4, 8.7) | 647  | ns<br>(0.68)       |

Lifetime: mean (95% confidence interval) from single exponential fit. N: number of particles analysed. Abbreviations: ↑: overexpression, ↓: depletion, xyl: xylose. P-value computed from two-sided Wilcoxon rank-sum test vs control. ns  $p \geq 0.05$ , \* $p < 0.05$ , \*\* $p < 0.01$ , \*\*\* $p < 0.001$ , \*\*\*\* $p < 0.0001$ ; p-value is written underneath in parenthesis.

**Supplementary Table 5: Z ring peak widths**

| Condition                                         | Strain | Z ring width (nm) | N    |
|---------------------------------------------------|--------|-------------------|------|
| Control                                           | bAB219 | 330 ± 40          | 2427 |
| FtsZ(T111A)                                       | bAB281 | 360 ± 40          | 962  |
| ↓ <i>ezrA</i>                                     | bGS588 | 390 ± 40          | 1685 |
| Δ <i>ezrA</i>                                     | bGS256 | 490 ± 50          | 1651 |
| ↓ <i>sepF</i>                                     | bGS590 | 320 ± 40          | 667  |
| Δ <i>sepF</i>                                     | bGS254 | 300 ± 40          | 657  |
| ↓ <i>zapA</i>                                     | bGS586 | 330 ± 40          | 885  |
| Δ <i>zapA</i>                                     | bGS250 | 320 ± 40          | 590  |
| Δ <i>sepF</i> Δ <i>zapA</i>                       | bGS368 | 310 ± 40          | 341  |
| Δ <i>ezrA</i> ↓ <i>sepF</i>                       | bGS290 | 590 ± 60          | 668  |
| ↓ <i>ezrA</i> Δ <i>sepF</i>                       | bGS298 | 510 ± 50          | 304  |
| Δ <i>ezrA</i> ↓ <i>zapA</i>                       | bGS293 | 610 ± 60          | 1555 |
| ↓ <i>ezrA</i> Δ <i>zapA</i>                       | bGS297 | 470 ± 50          | 822  |
| ↓ <i>ezrA</i> Δ <i>sepF</i> Δ <i>zapA</i> (ΔZBPs) | bGS308 | 550 ± 50          | 436  |
| FtsZ(K86E)                                        | bGS432 | 340 ± 40          | 888  |
| FtsZ(K86E) Δ <i>ezrA</i> Δ <i>zapA</i>            | bGS463 | 450 ± 50          | 208  |

Z ring width: Full width at half maximum of the average Z ring intensity peak ± bootstrapped standard error. N: number of Z rings analysed. Abbreviations: ↓: depletion.

**Supplementary Table 6: Index of strains and experimental conditions**

| Figure | Label   | Strain             | Induction and labelling conditions                      |
|--------|---------|--------------------|---------------------------------------------------------|
| 1b     | EzrA    | bMH42              | 300 pM JF549-HTL, 15 min                                |
| 1b     | SepF    | bMH372             | no IPTG<br>200 pM JF549-HTL, 15 min                     |
| 1b     | ZapA    | bMH560             | 600 pM JF549-HTL, 15 min                                |
| 1c     | DivIB   | bAB366             | 1 mM xyl, continuous<br>400 pM JF549-HTL, 15 min        |
| 1c     | DivIC   | bAB367             | 5 mM xyl, continuous<br>500 pM JF549-HTL, 15 min        |
| 1c     | FtsL    | bGS165             | 30 $\mu$ M IPTG, continuous<br>40 pM JF549-HTL, 15 min  |
| 1c     | FtsW    | bAB368             | 8 mM xyl, continuous<br>300 pM JF549-HTL, 15 min        |
| 1c     | Pbp2B   | bGS31              | 20 $\mu$ M IPTG, continuous<br>200 pM JF549-HTL, 15 min |
| 1d     | DivIB   | bAB366             | 1 mM xyl, continuous<br>400 pM JF549-HTL, 15 min        |
| 1d     | DivIC   | bAB367             | 5 mM xyl, continuous<br>500 pM JF549-HTL, 15 min        |
| 1d     | FtsL    | bGS165             | 30 $\mu$ M IPTG, continuous<br>40 pM JF549-HTL, 15 min  |
| 1d     | FtsW    | bAB368             | 8 mM xyl, continuous<br>300 pM JF549-HTL, 15 min        |
| 1d     | Pbp2B   | bGS31              | 20 $\mu$ M IPTG, continuous<br>200 pM JF549-HTL, 15 min |
| 2b     |         | bAB309             | 20 $\mu$ M IPTG, 1 hr<br>20 pM JF549-HTL, 1 hr          |
| 2c     |         | bAB309 &<br>bGS104 | 20 $\mu$ M IPTG, 1 hr<br>20 pM JF549-HTL, 1 hr          |
| 2d     |         | bGS104             | 20 $\mu$ M IPTG, 1 hr<br>20 pM JF549-HTL, 1 hr          |
| 2e     | Slower  | bGS109             | 20 pM JF549-HTL, 1 hr                                   |
| 2e     | Control | bAB309 &<br>bGS104 | 20 $\mu$ M IPTG, 1 hr<br>20 pM JF549-HTL, 1 hr          |
| 2e     | Faster  | bGS328             | ~65 mM xyl, during imaging<br>20 pM JF549-HTL, 1 hr     |
| 2f     | FtsZ    | bAB309 &<br>bGS104 | 20 $\mu$ M IPTG, 1 hr<br>20 pM JF549-HTL, 1 hr          |
| 2f     | FtsA    | bAB213             | 50 pM JF549-HTL, 15 min                                 |
| 2f     | EzrA    | bMH03              | 300 pM JF549-HTL, 15 min                                |
| 2f     | SepF    | bMH332             | no IPTG<br>200 pM JF549-HTL, 15 min                     |



|           |                 |                 |                                                                                          |
|-----------|-----------------|-----------------|------------------------------------------------------------------------------------------|
| 2f        | ZapA            | bMH559          | 600 pM JF549-HTL, 15 min                                                                 |
| 3a, left  | Control         | bAB219          | 20 $\mu$ M IPTG, 1 hr                                                                    |
| 3a, left  | $\Delta$ ezrA   | bGS256          | 20 $\mu$ M IPTG, 1 hr                                                                    |
| 3a, left  | $\Delta$ sepF   | bGS254          | 20 $\mu$ M IPTG, 1 hr                                                                    |
| 3a, left  | $\Delta$ zapA   | bGS250          | 20 $\mu$ M IPTG, 1 hr                                                                    |
| 3a, right | Control         | bAB309 & bGS104 | 20 $\mu$ M IPTG, 1 hr<br>20 pM JF549-HTL, 1 hr                                           |
| 3a, right | $\Delta$ ezrA   | bGS167          | 20 $\mu$ M IPTG, 1 hr<br>20 pM JF549-HTL, 1 hr                                           |
| 3a, right | $\Delta$ sepF   | bGS304          | 20 $\mu$ M IPTG, 1 hr<br>20 pM JF549-HTL, 1 hr                                           |
| 3a, right | $\Delta$ zapA   | bGS141          | 20 $\mu$ M IPTG, 1 hr<br>20 pM JF549-HTL, 1 hr                                           |
| 3b, left  | Control         | bAB219          | 20 $\mu$ M IPTG, 1 hr                                                                    |
| 3b left   | $\uparrow$ ezrA | bGS263          | xyl as indicated, 2 hr<br>20 $\mu$ M IPTG, 1 hr                                          |
| 3b, right | Control         | bAB309 & bGS104 | 20 $\mu$ M IPTG, 1 hr<br>20 pM JF549-HTL, 1 hr                                           |
| 3b, right | $\uparrow$ ezrA | bGS157          | xyl as indicated, 2 hr<br>20 $\mu$ M IPTG, 1 hr<br>20 pM JF549-HTL, 1 hr                 |
| 3c        | Control         | bAB219          | 20 $\mu$ M IPTG, 1 hr                                                                    |
| 3c        | $\uparrow$ ezrA | bGS263          | xyl as indicated, 2 hr<br>20 $\mu$ M IPTG, 1 hr                                          |
| 3d, left  | Control         | bAB219          | 20 $\mu$ M IPTG, 1 hr                                                                    |
| 3d, left  | $\Delta$ ZBPs   | bGS308          | 1 mM xyl overnight, withdrawn for 7 hr<br>20 $\mu$ M IPTG, 1 hr                          |
| 3d, right | Control         | bAB309 & bGS104 | 20 $\mu$ M IPTG, 1 hr<br>20 pM JF549-HTL, 1 hr                                           |
| 3d, right | $\Delta$ ZBPs   | bGS331          | 1 mM xyl overnight, withdrawn for 7 hr<br>20 $\mu$ M IPTG, 1 hr<br>20 pM JF549-HTL, 1 hr |
| 3e        | Control         | bAB219          | 20 $\mu$ M IPTG, 1 hr                                                                    |
| 3e        | $\Delta$ ZBPs   | bGS308          | 1 mM xyl overnight, withdrawn for 7 hr<br>20 $\mu$ M IPTG, 1 hr                          |
| 3f        | Control         | bAB219          | 20 $\mu$ M IPTG, 1 hr                                                                    |
| 3f        | $\Delta$ ZBPs   | bGS308          | 1 mM xyl overnight, withdrawn for 7 hr<br>20 $\mu$ M IPTG, 1 hr                          |
| 3g        | $\Delta$ ZBPs   | bGS308          | 1 mM xyl overnight, withdrawn for 7 hr<br>20 $\mu$ M IPTG, 1 hr                          |
| 4a        |                 | bAB219          | 20 $\mu$ M IPTG, 1 hr                                                                    |
| 4b        |                 | bAB219          | 20 $\mu$ M IPTG, 1 hr                                                                    |

|      |                                           |        |                                                                                                                                  |
|------|-------------------------------------------|--------|----------------------------------------------------------------------------------------------------------------------------------|
| 4c   | Control                                   | bAB219 | 20 $\mu$ M IPTG, 1 hr                                                                                                            |
| 4c   | $\Delta$ ezrA $\downarrow$ zapA           | bGS293 | 1 mM xyl overnight, withdrawn for 7 hr<br>20 $\mu$ M IPTG, 1 hr                                                                  |
| 4c   | FtsZ(K86E)<br>$\Delta$ ezrA $\Delta$ zapA | bGS463 | 20 $\mu$ M IPTG, 1 hr                                                                                                            |
| 4d   |                                           | bMH443 | 1 mM xyl overnight, withdrawn for 7 hr<br>100 $\mu$ M IPTG overnight, reduced to 20 $\mu$ M for 7 hr<br>100 pM JF549-HTL, 15 min |
| 4e   | Control: Pbp2B<br>colocalization          | bGS104 | 20 $\mu$ M IPTG, 1 hr<br>5 nM JF549-HTL, 1 hr                                                                                    |
| 4e   | Control: FDAA<br>labelling                | bMH510 | 20 $\mu$ M IPTG, 1 hr<br>5 nM JF549-HTL, 1 hr<br>1 mM FDL, 3 min, washed out                                                     |
| 4e   | $\Delta$ ZBPs: Pbp2B<br>colocalization    | bMH445 | 1 mM xyl overnight, withdrawn for 7 hr<br>20 $\mu$ M IPTG, 1 hr<br>5 nM JF549-HTL, 1 hr                                          |
| 4e   | $\Delta$ ZBPs: FDAA<br>labelling          | bMH508 | 1 mM xyl overnight, withdrawn for 7 hr<br>20 $\mu$ M IPTG, 1 hr<br>5 nM JF549-HTL, 1 hr<br>1 mM FDL, 3 min, washed out           |
| ED1a | WT                                        | PY79   |                                                                                                                                  |
| ED1a | HT-FtsZ                                   | bAB309 | 20 $\mu$ M IPTG, 2 hr                                                                                                            |
| ED1a | FtsA-HT(sw)                               | bAB213 |                                                                                                                                  |
| ED1a | EzrA-HT                                   | bMH03  |                                                                                                                                  |
| ED1a | SepF-HT                                   | bMH332 | no IPTG                                                                                                                          |
| ED1a | ZapA-HT                                   | bMH559 |                                                                                                                                  |
| ED1a | HT-DivIB                                  | bAB352 | 1 mM xyl, continuous                                                                                                             |
| ED1a | HT-DivIC                                  | bAB347 | 10 mM xyl, continuous                                                                                                            |
| ED1a | HT-FtsL                                   | bMH47  | 50 $\mu$ M IPTG, continuous                                                                                                      |
| ED1a | HT-FtsW                                   | bAB350 | 10 mM xyl, continuous                                                                                                            |
| ED1a | HT-Pbp2B                                  | bGS28  | 50 $\mu$ M IPTG, continuous                                                                                                      |
| ED1b | WT                                        | PY79   |                                                                                                                                  |
| ED1b | $\Delta$ ezrA                             | bMH45  |                                                                                                                                  |
| ED1b | $\Delta$ sepF                             | bSW234 |                                                                                                                                  |
| ED1b | $\Delta$ zapA                             | RL2638 |                                                                                                                                  |
| ED1b | $\Delta$ divIB                            | bMH92  |                                                                                                                                  |
| ED1c | $\Delta$ zapA                             | RL2638 |                                                                                                                                  |
| ED1c | $\Delta$ zapA<br>EzrA-HT                  | bMH221 |                                                                                                                                  |
| ED1c | $\Delta$ ezrA                             | bMH45  |                                                                                                                                  |
| ED1c | $\Delta$ ezrA<br>SepF-HT                  | bMH542 | no IPTG                                                                                                                          |

|             |                          |                    |                                                                 |
|-------------|--------------------------|--------------------|-----------------------------------------------------------------|
| ED1c        | $\Delta$ ezrA<br>ZapA-HT | bMH565             |                                                                 |
| ED2a        |                          | bAB309 &<br>bGS104 | 20 $\mu$ M IPTG,1 hr<br>20 pM JF549-HTL,1 hr                    |
| ED2b        | HMM                      | bAB309 &<br>bGS104 | 20 $\mu$ M IPTG,1 hr<br>20 pM JF549-HTL,1 hr                    |
| ED2b        | Manual                   | bAB309             | 20 $\mu$ M IPTG,1 hr<br>20 pM JF549-HTL,1 hr                    |
| ED2c        | 1 colour                 | bAB309             | 20 $\mu$ M IPTG,1 hr<br>20 pM JF549-HTL,1 hr                    |
| ED2c        | 2 colour                 | bGS104             | 20 $\mu$ M IPTG,1 hr<br>20 pM JF549-HTL,1 hr                    |
| ED2d        | 0.5 s                    | bAB309 &<br>bGS104 | 20 $\mu$ M IPTG,1 hr<br>20 pM JF549-HTL,1 hr                    |
| ED2d        | 1 s                      | bAB309             | 20 $\mu$ M IPTG,1 hr<br>20 pM JF549-HTL,1 hr                    |
| ED2e        | Control                  | bAB219             | 20 $\mu$ M IPTG,1 hr                                            |
| ED2e        | $\uparrow$ ftsAZ         | bAB219             | 100 $\mu$ M IPTG, 1 hr                                          |
| ED2f        | Control                  | bAB309 &<br>bGS104 | 20 $\mu$ M IPTG,1 hr<br>20 pM JF549-HTL,1 hr                    |
| ED2f        | $\uparrow$ ftsAZ         | bAB309             | 100 $\mu$ M IPTG, 2 hr<br>20 pM JF549-HTL,1 hr                  |
| ED3         | Control                  | bAB219             | 20 $\mu$ M IPTG,1 hr                                            |
| ED3         | $\Delta$ ezrA            | bGS256             | 20 $\mu$ M IPTG,1 hr                                            |
| ED3         | $\Delta$ sepF            | bGS254             | 20 $\mu$ M IPTG,1 hr                                            |
| ED3         | $\Delta$ zapA            | bGS250             | 20 $\mu$ M IPTG,1 hr                                            |
| ED3         | FtsZ(T111A)              | bAB281             | 20 $\mu$ M IPTG,1 hr                                            |
| ED4a        | $\uparrow$ sepF          | bGS260             | 30 mM xyl, 2 hr<br>20 $\mu$ M IPTG,1 hr                         |
| ED4a        | $\uparrow$ zapA          | bGS259             | 30 mM xyl, 2 hr<br>20 $\mu$ M IPTG,1 hr                         |
| ED4b, left  | Control                  | bAB219             | 20 $\mu$ M IPTG,1 hr                                            |
| ED4b, left  | $\uparrow$ sepF          | bGS260             | 30 mM xyl, 2 hr<br>20 $\mu$ M IPTG,1 hr                         |
| ED4b, left  | $\uparrow$ zapA          | bGS259             | 30 mM xyl, 2 hr<br>20 $\mu$ M IPTG,1 hr                         |
| ED4b, right | Control                  | bAB309 &<br>bGS104 | 20 $\mu$ M IPTG,1 hr<br>20 pM JF549-HTL,1 hr                    |
| ED4b, right | $\uparrow$ sepF          | bGS158             | 30 mM xyl, 2 hr<br>20 $\mu$ M IPTG,1 hr<br>20 pM JF549-HTL,1 hr |

|             |                                              |                    |                                                                                     |
|-------------|----------------------------------------------|--------------------|-------------------------------------------------------------------------------------|
| ED4b, right | ↑ <i>zapA</i>                                | bGS159             | 30 mM xyl, 2 hr<br>20 μM IPTG, 1 hr<br>20 pM JF549-HTL, 1 hr                        |
| ED4c        | Control                                      | bAB219             | 50 μM IPTG, 1 hr                                                                    |
| ED4c        | ↑ <i>ezrA</i>                                | bGS263             | xyl as indicated, 2 hr<br>50 μM IPTG, 1 hr                                          |
| ED5         | Control                                      | bAB219             | 20 μM IPTG, 1 hr                                                                    |
| ED5         | Δ <i>ezrA</i> ↓ <i>sepF</i>                  | bGS290             | 1 mM xyl overnight, withdrawn for 7 hr<br>20 μM IPTG, 1 hr                          |
| ED5         | ↓ <i>ezrA</i> Δ <i>sepF</i>                  | bGS298             | 1 mM xyl overnight, withdrawn for 7 hr<br>20 μM IPTG, 1 hr                          |
| ED5         | Δ <i>ezrA</i> ↓ <i>zapA</i>                  | bGS293             | 1 mM xyl overnight, withdrawn for 7 hr<br>20 μM IPTG, 1 hr                          |
| ED5         | ↓ <i>ezrA</i> Δ <i>zapA</i>                  | bGS297             | 1 mM xyl overnight, withdrawn for 7 hr<br>20 μM IPTG, 1 hr                          |
| ED5         | ↓ <i>ezrA</i> Δ <i>sepF</i><br>Δ <i>zapA</i> | bGS308             | 1 mM xyl overnight, withdrawn for 7 hr<br>20 μM IPTG, 1 hr                          |
| ED6a, left  | Control                                      | bAB219             | 20 μM IPTG, 1 hr                                                                    |
| ED6a, left  | Δ <i>ezrA</i> ↓ <i>sepF</i>                  | bGS290             | 1 mM xyl overnight, withdrawn for 7 hr<br>20 μM IPTG, 1 hr                          |
| ED6a, left  | ↓ <i>ezrA</i> Δ <i>sepF</i>                  | bGS298             | 1 mM xyl overnight, withdrawn for 7 hr<br>20 μM IPTG, 1 hr                          |
| ED6a, left  | Δ <i>ezrA</i> ↓ <i>zapA</i>                  | bGS293             | 1 mM xyl overnight, withdrawn for 7 hr<br>20 μM IPTG, 1 hr                          |
| ED6a, left  | ↓ <i>ezrA</i> Δ <i>zapA</i>                  | bGS297             | 1 mM xyl overnight, withdrawn for 7 hr<br>20 μM IPTG, 1 hr                          |
| ED6a, left  | ↓ <i>ezrA</i> Δ <i>sepF</i><br>Δ <i>zapA</i> | bGS308             | 1 mM xyl overnight, withdrawn for 7 hr<br>20 μM IPTG, 1 hr                          |
| ED6a, right | Control                                      | bAB309 &<br>bGS104 | 20 μM IPTG, 1 hr<br>20 pM JF549-HTL, 1 hr                                           |
| ED6a, right | Δ <i>ezrA</i> ↓ <i>sepF</i>                  | bGS204             | 1 mM xyl overnight, withdrawn for 7 hr<br>20 μM IPTG, 1 hr<br>20 pM JF549-HTL, 1 hr |
| ED6a, right | ↓ <i>ezrA</i> Δ <i>sepF</i>                  | bGS316             | 1 mM xyl overnight, withdrawn for 7 hr<br>20 μM IPTG, 1 hr<br>20 pM JF549-HTL, 1 hr |
| ED6a, right | Δ <i>ezrA</i> ↓ <i>zapA</i>                  | bGS206             | 1 mM xyl overnight, withdrawn for 7 hr<br>20 μM IPTG, 1 hr<br>20 pM JF549-HTL, 1 hr |
| ED6a, right | ↓ <i>ezrA</i> Δ <i>zapA</i>                  | bGS306             | 1 mM xyl overnight, withdrawn for 7 hr<br>20 μM IPTG, 1 hr<br>20 pM JF549-HTL, 1 hr |
| ED6a, right | ↓ <i>ezrA</i> Δ <i>sepF</i><br>Δ <i>zapA</i> | bGS331             | 1 mM xyl overnight, withdrawn for 7 hr<br>20 μM IPTG, 1 hr<br>20 pM JF549-HTL, 1 hr |

|                    |                                                                       |                    |                                                                 |
|--------------------|-----------------------------------------------------------------------|--------------------|-----------------------------------------------------------------|
| ED6b               | Control                                                               | bAB219             | 20 $\mu$ M IPTG, 1 hr                                           |
| ED6b               | $\Delta$ <i>ezrA</i> $\downarrow$ <i>sepF</i>                         | bGS290             | 1 mM xyl overnight, withdrawn for 7 hr<br>20 $\mu$ M IPTG, 1 hr |
| ED6b               | $\downarrow$ <i>ezrA</i> $\Delta$ <i>sepF</i>                         | bGS298             | 1 mM xyl overnight, withdrawn for 7 hr<br>20 $\mu$ M IPTG, 1 hr |
| ED6b               | $\Delta$ <i>ezrA</i> $\downarrow$ <i>zapA</i>                         | bGS293             | 1 mM xyl overnight, withdrawn for 7 hr<br>20 $\mu$ M IPTG, 1 hr |
| ED6b               | $\downarrow$ <i>ezrA</i> $\Delta$ <i>zapA</i>                         | bGS297             | 1 mM xyl overnight, withdrawn for 7 hr<br>20 $\mu$ M IPTG, 1 hr |
| ED6b               | $\downarrow$ <i>ezrA</i> $\Delta$ <i>sepF</i><br>$\Delta$ <i>zapA</i> | bGS308             | 1 mM xyl overnight, withdrawn for 7 hr<br>20 $\mu$ M IPTG, 1 hr |
| ED6c, left         | Control                                                               | bAB219             | 20 $\mu$ M IPTG, 1 hr                                           |
| ED6c, left         | $\Delta$ <i>ezrA</i>                                                  | bGS256             | 20 $\mu$ M IPTG, 1 hr                                           |
| ED6c, left         | $\downarrow$ <i>sepF</i>                                              | bGS590             | 1 mM xyl overnight, withdrawn for 7 hr<br>20 $\mu$ M IPTG, 1 hr |
| ED6c, left         | $\downarrow$ <i>zapA</i>                                              | bGS586             | 1 mM xyl overnight, withdrawn for 7 hr<br>20 $\mu$ M IPTG, 1 hr |
| ED6c, left         | $\Delta$ <i>ezrA</i> $\downarrow$ <i>sepF</i>                         | bGS290             | 1 mM xyl overnight, withdrawn for 7 hr<br>20 $\mu$ M IPTG, 1 hr |
| ED6c, left         | $\Delta$ <i>ezrA</i> $\downarrow$ <i>zapA</i>                         | bGS293             | 1 mM xyl overnight, withdrawn for 7 hr<br>20 $\mu$ M IPTG, 1 hr |
| ED6c, right        | Control                                                               | bAB219             | 20 $\mu$ M IPTG, 1 hr                                           |
| ED6c, right        | $\downarrow$ <i>ezrA</i>                                              | bGS588             | 1 mM xyl overnight, withdrawn for 7 hr<br>20 $\mu$ M IPTG, 1 hr |
| ED6c, right        | $\Delta$ <i>sepF</i>                                                  | bGS254             | 20 $\mu$ M IPTG, 1 hr                                           |
| ED6c, right        | $\Delta$ <i>zapA</i>                                                  | bGS250             | 20 $\mu$ M IPTG, 1 hr                                           |
| ED6c, right        | $\downarrow$ <i>ezrA</i> $\Delta$ <i>sepF</i>                         | bGS298             | 1 mM xyl overnight, withdrawn for 7 hr<br>20 $\mu$ M IPTG, 1 hr |
| ED6c, right        | $\downarrow$ <i>ezrA</i> $\Delta$ <i>zapA</i>                         | bGS297             | 1 mM xyl overnight, withdrawn for 7 hr<br>20 $\mu$ M IPTG, 1 hr |
| ED6c, right        | $\downarrow$ <i>ezrA</i> $\Delta$ <i>sepF</i><br>$\Delta$ <i>zapA</i> | bGS308             | 1 mM xyl overnight, withdrawn for 7 hr<br>20 $\mu$ M IPTG, 1 hr |
| ED7, top           | Control                                                               | bAB219             | 20 $\mu$ M IPTG, 1 hr                                           |
| ED7, top           | $\Delta$ <i>sepF</i> $\Delta$ <i>zapA</i>                             | bGS368             | 20 $\mu$ M IPTG, 1 hr                                           |
| ED7, bottom left   | Control                                                               | bAB219             | 20 $\mu$ M IPTG, 1 hr                                           |
| ED7, bottom left   | $\Delta$ <i>sepF</i> $\Delta$ <i>zapA</i>                             | bGS368             | 20 $\mu$ M IPTG, 1 hr                                           |
| ED7, bottom centre | Control                                                               | bAB309 &<br>bGS104 | 20 $\mu$ M IPTG, 1 hr<br>20 pM JF549-HTL, 1 hr                  |
| ED7, bottom centre | $\Delta$ <i>sepF</i> $\Delta$ <i>zapA</i>                             | bGS318             | 20 $\mu$ M IPTG, 1 hr<br>20 pM JF549-HTL, 1 hr                  |

|                   |                                         |        |                                                                                                                                  |
|-------------------|-----------------------------------------|--------|----------------------------------------------------------------------------------------------------------------------------------|
| ED7, bottom right | Control                                 | bAB219 | 20 $\mu$ M IPTG, 1 hr                                                                                                            |
| ED7, bottom right | $\Delta sepF \Delta zapA$               | bGS368 | 20 $\mu$ M IPTG, 1 hr                                                                                                            |
| ED8a              | FtsZ(K86E)                              | bGS432 | 20 $\mu$ M IPTG, 1 hr                                                                                                            |
| ED8a              | FtsZ(K86E)<br>$\Delta ezrA \Delta zapA$ | bGS463 | 20 $\mu$ M IPTG, 1 hr                                                                                                            |
| ED8b              | Control                                 | bAB219 | 20 $\mu$ M IPTG, 1 hr                                                                                                            |
| ED8b              | FtsZ(K86E)                              | bGS432 | 20 $\mu$ M IPTG, 1 hr                                                                                                            |
| ED8b              | FtsZ(K86E)<br>$\Delta ezrA \Delta zapA$ | bGS463 | 20 $\mu$ M IPTG, 1 hr                                                                                                            |
| ED8c              | Control                                 | bGS104 | 20 $\mu$ M IPTG, 1 hr<br>5 nM JF549-HTL, 1 hr                                                                                    |
| ED8c              | FtsZ(K86E)                              | bGS618 | 20 $\mu$ M IPTG, 1 hr<br>5 nM JF549-HTL, 1 hr                                                                                    |
| ED8c              | $\Delta ezrA \downarrow zapA$           | bGS644 | 1 mM xyl overnight, withdrawn for 7 hr<br>20 $\mu$ M IPTG, 1 hr<br>5 nM JF549-HTL, 1 hr                                          |
| ED8c              | FtsZ(K86E)<br>$\Delta ezrA \Delta zapA$ | bGS628 | 20 $\mu$ M IPTG, 1 hr<br>5 nM JF549-HTL, 1 hr                                                                                    |
| ED9a              | Control                                 | bGS104 | 20 $\mu$ M IPTG, 1 hr<br>5 nM JF549-HTL, 1 hr                                                                                    |
| ED9a              | $\Delta ZBPs$                           | bMH445 | 1 mM xyl overnight, withdrawn for 7 hr<br>20 $\mu$ M IPTG, 1 hr<br>5 nM JF549-HTL, 1 hr                                          |
| ED9b              | Control                                 | bMH510 | 20 $\mu$ M IPTG, 1 hr<br>5 nM JF549-HTL, 1 hr<br>1 mM FDL, 3 min, washed out                                                     |
| ED9b              | $\Delta ZBPs$                           | bMH508 | 1 mM xyl overnight, withdrawn for 7 hr<br>20 $\mu$ M IPTG, 1 hr<br>5 nM JF549-HTL, 1 hr<br>1 mM FDL, 3 min, washed out           |
| ED9c              |                                         | bGS104 | 20 $\mu$ M IPTG, 1 hr<br>5 nM JF549-HTL, 1 hr                                                                                    |
| ED9d              | Control                                 | bMH512 | 100 $\mu$ M IPTG overnight, reduced to 20 $\mu$ M for 7 hr<br>100 pM JF549-HTL, 15 min                                           |
| ED9d              | $\Delta ZBPs$                           | bMH443 | 1 mM xyl overnight, withdrawn for 7 hr<br>100 $\mu$ M IPTG overnight, reduced to 20 $\mu$ M for 7 hr<br>100 pM JF549-HTL, 15 min |
| ED10a             | Control                                 | bGS630 | 30 mM xyl, 1 hr                                                                                                                  |
| ED10a             | $\Delta ftsA$                           | bGS639 | 10 $\mu$ M IPTG, continuous<br>30 mM xyl, 1 hr                                                                                   |
| ED10b             | Control                                 | bGS630 | 30 mM xyl, 1 hr                                                                                                                  |
| ED10b             | $\Delta ftsA$                           | bGS639 | 10 $\mu$ M IPTG, continuous<br>30 mM xyl, 1 hr                                                                                   |

|         |                        |        |                                                                 |
|---------|------------------------|--------|-----------------------------------------------------------------|
| ED10c   | Control                | bGS630 | 30 mM xyl, 1 hr                                                 |
| ED10c   | $\Delta$ <i>ftsA</i>   | bGS639 | 10 $\mu$ M IPTG, continuous<br>30 mM xyl, 1 hr                  |
| Video 1 |                        | bAB219 | 20 $\mu$ M IPTG, 1 hr                                           |
| Video 2 | EzrA                   | bMH42  | 300 pM JF549-HTL, 15 min                                        |
| Video 2 | SepF                   | bMH372 | no IPTG<br>200 pM JF549-HTL, 15 min                             |
| Video 2 | ZapA                   | bMH559 | 600 pM JF549-HTL, 15 min                                        |
| Video 3 | DivIB                  | bAB366 | 1 mM xyl, continuous<br>400 pM JF549-HTL, 15 min                |
| Video 3 | DivIC                  | bAB367 | 5 mM xyl, continuous<br>500 pM JF549-HTL, 15 min                |
| Video 3 | FtsL                   | bGS165 | 30 $\mu$ M IPTG, continuous<br>40 pM JF549-HTL, 15 min          |
| Video 3 | FtsW                   | bAB368 | 8 mM xyl, continuous<br>300 pM JF549-HTL, 15 min                |
| Video 3 | Pbp2B                  | bGS31  | 20 $\mu$ M IPTG, continuous<br>200 pM JF549-HTL, 15 min         |
| Video 4 |                        | bAB309 | 20 $\mu$ M IPTG, 1 hr<br>20 pM JF549-HTL, 1 hr                  |
| Video 5 | Control                | bAB219 | 50 $\mu$ M IPTG, 1 hr                                           |
| Video 5 | $\uparrow$ <i>ezrA</i> | bGS263 | xyl as indicated, 2 hr<br>50 $\mu$ M IPTG, 1 hr                 |
| Video 6 | Control                | bAB219 | 20 $\mu$ M IPTG, 1 hr                                           |
| Video 6 | $\Delta$ ZBPs          | bGS308 | 1 mM xyl overnight, withdrawn for 7 hr<br>20 $\mu$ M IPTG, 1 hr |
| Video 7 | Control                | bGS630 | 30 mM xyl, 1 hr                                                 |
| Video 7 | $\Delta$ <i>ftsA</i>   | bGS639 | 10 $\mu$ M IPTG, continuous<br>30 mM xyl, 1 hr                  |

Abbreviations:  $\uparrow$ : overexpression,  $\downarrow$ : depletion, xyl: xylose, JF549-HTL: JF549-HaloTag linker, FDL: fluorescent D-lysine.

## Supplementary Discussion 1

Understanding EzrA's function has been complicated by EzrA's apparently contradictory effects on the Z ring. On one hand, EzrA has been repeatedly characterized as a negative regulator of FtsZ polymers<sup>13,30-33,65,66</sup>. On the other hand, EzrA is known to be synthetically lethal with SepF and ZapA, which are positive regulators of FtsZ<sup>18,29</sup>. It has also been shown that EzrA's role in inhibiting polar Z ring formation and EzrA's role at midcell are separable: mutants in EzrA can be made that disrupt one of these functions but not the other<sup>34,67</sup>.

The results presented here also indicate that EzrA has two separable functions. We find that EzrA plays a positive role in condensing the Z ring *in vivo*, working together with SepF and ZapA to promote lateral bundling of the Z ring. Z ring condensation is essential for cell division, and this function explains the synthetic lethality of  $\Delta e z r A$  mutants with  $\Delta s e p F$  and  $\Delta z a p A$  mutants<sup>18,29</sup>. We additionally find that EzrA decreases the length of FtsZ filaments. This is consistent with the inhibition of Z ring formation by *e z r A* overexpression<sup>30</sup> and the fact that Z rings in  $\Delta e z r A$  cells recover more slowly after photobleaching<sup>13</sup>. We find that this length decrease does not change FtsZ's treadmilling dynamics, and thus the concentration of free FtsZ monomer. This agrees with *in vitro* results that EzrA has no effect on FtsZ's GTPase activity<sup>30,32</sup>. Because EzrA has also been shown to increase the amount of FtsZ needed to form polymer<sup>30,31,33</sup>, and because EzrA is highly expressed in the cell (10,000-20,000 molecules per cell, versus 5,000 for FtsZ)<sup>30,68</sup>, this length decrease is likely due to monomer sequestration, as previously proposed<sup>31</sup>.

Our results also indicate that these two functions are separable. In cells missing both EzrA and one or both of its synthetically lethal partners  $\Delta s e p F$  or  $\Delta z a p A$ , Z ring condensation is disrupted but we no longer observe a change in filament length. There are several possible mechanisms by which EzrA's effect on length may be absent in these conditions. One possibility is that this effect happens specifically during Z ring constriction, as has been previously suggested for EzrA; because cytokinesis is inhibited in these conditions, such effects would be lost<sup>18,69</sup>. More generally, inhibition of cell division may trigger stress responses that affect FtsZ polymer equilibria. Regardless, the observation that EzrA's effects are separable is consistent with previous studies<sup>34,67</sup>, and our results indicate that EzrA's role in bundling is of primary importance for cell division.



## Supplementary Video Legends

**Supplementary Video 1:** FtsZ filaments treadmill around the cell. Cells expressing FtsZ-mNeonGreen (strain bAB219) were induced with 20  $\mu$ M IPTG for 2 hours, then imaged at 1-second intervals for 100 seconds by TIRFM. The video is displayed at 30 frames per second (30x actual speed). Scale bar: 5  $\mu$ m.

**Supplementary Video 2:** Single molecules of EzrA, SepF, and ZapA are stationary. Each protein was expressed as a HaloTag fusion and labelled with JF549-HTL dye for single-molecule imaging using TIRFM. Videos begin with an image of the Z rings in each cell, visualized by FtsZ-mNeonGreen. Cells were imaged at 1-second intervals for 200 seconds; every other frame is displayed here. The video is displayed at 30 frames per second (60x actual speed). Scale bar: 5  $\mu$ m.

**Supplementary Video 3:** Single molecules of DivIB, DivIC, FtsL, FtsW, and Pbp2B move directionally around the division site. Each protein was expressed as a HaloTag fusion and labelled with JF549-HTL dye for single-molecule imaging using TIRFM. Videos begin with an image of the Z rings in each cell, visualized by FtsZ-mNeonGreen. Cells were imaged at 1-second intervals for 200 seconds; every other frame is displayed here. The video is displayed at 30 frames per second (60x actual speed). Scale bar: 5  $\mu$ m.

**Supplementary Video 4:** Single-molecule imaging of FtsZ for lifetime analysis. Cells expressing FtsZ-HaloTag were imaged at 500-ms intervals for 50 seconds by TIRFM. The video is displayed at 30 frames per second (15x actual speed). Scale bar: 5  $\mu$ m.

**Supplementary Video 5:** EzrA overexpression decreases FtsZ filament length, visualized by SIM-TIRF microscopy. A second copy of *ezrA* was expressed from a xylose-inducible promoter. Panel labels indicate the amount of xylose added in each experiment. Cells expressed FtsZ-mNeonGreen to visualize FtsZ filaments and were imaged at 1-second intervals for 100 seconds by SIM-TIRF microscopy. The video is displayed at 30 frames per second (30x actual speed). Scale bar: 5  $\mu$ m.

**Supplementary Video 6:** FtsZ filament treadmilling is unaltered in the absence of ZBPs.  $\Delta$ ZBPs cells have *sepF* and *zapA* knocked out, and *ezrA* depleted from a xylose-inducible promoter for 7 hours prior to imaging. Cells expressing FtsZ-mNeonGreen were imaged at 1-second intervals for 100 seconds by TIRFM. The video is displayed at 30 frames per second (30x actual speed). Scale bar: 5  $\mu$ m.

**Supplementary Video 7:** FtsA filaments show less directional treadmilling in a  $\Delta$ *ftsA* strain.  $\Delta$ *ftsA* cells express FtsZ under the pHyperSpank promoter induced with 10  $\mu$ M IPTG. Cells expressing FtsZ-mNeonGreen were imaged at 1-second intervals for 100 seconds by TIRFM. The video is displayed at 30 frames per second (30x actual speed). Scale bar: 5  $\mu$ m.
